# Supplementary material for: Fragment evolution for GPCRs: the role of secondary binding sites in optimization
Source: Royal Society of Chemistry journal article supplement (doi:10.1039/d1cc04636e), 2021-01-01
Supplement: d1cc04636e1.xlsx [file d1cc04636e1.xlsx]

## Sheet: default_1
fragA	fragB	article_id	logKD_b1	s.e.m (b1)	KD_b1 (nM)	LE_b1	n_b1	logKD_b2	s.e.m (b2)	KD_b2 (nM)	LE_b2	n_b2	fold_昨2_selective	fold_affinity_change_b1_from_core	fold_affinity_change_b2_from_core	mol_smi	NumHeavyAtoms
1	1	A1B1	-6.4	0.05	398.107	0.337637	5	-7.04	0.05	91.2011	0.371401	5	4.4	9.1	26.9	O=C(NCCNC[C@H](O)c1cc2ccccc2s1)OCc1ccccc1	26
1	2	A1B2	-5.22	0.05	6025.6	0.230968	4	-5.95	0.02	1122.02	0.263268	4	5.4	-1.7	2.2	CCOC(=O)c1cc(-c2ccc(Cl)cc2)oc1CNC[C@H](O)c1cc2ccccc2s1	31
1	3	A1B3	-5.15	0.07apparent	7079.46	0.227871	5	-6.43	0.09	371.535	0.284507	5	18.2	-1.9	6.6	O[C@@H](CNCc1cn(-c2ccc(F)cc2)nc1-c1cccs1)c1cc2ccccc2s1	31
1	4	A1B4	-5.48	0.03	3311.31	0.289102	5	-6.24	0.11	575.44	0.329196	5	5.8	1.1	4.3	Cc1ccc(CNC[C@H](O)c2cc3ccccc3s2)n1-c1ccncc1	26
1	5	A1B5	-5.53	0.03	2951.21	0.244685	5	-6.86	0.07	138.038	0.303533	5	21.4	1.2	17.8	O[C@@H](CNCc1cn(-c2ccccc2)nc1-c1ccccc1)c1cc2ccccc2s1	31
1	7	A1B7	-5.77	0.06	1698.24	0.316577	5	-6.26	0.05	549.541	0.343461	5	3.1	2.1	4.5	OCCOc1ccc(CNC[C@H](O)c2cc3ccccc3s2)cc1F	25
1	8	A1B8	-5.76	0.08	1737.8	0.343509	5	-6.53	0.08	295.121	0.389429	5	5.9	2.1	8.6	OCCc1ccc(CNC[C@H](O)c2cc3ccccc3s2)cc1	23
1	9	A1B10	-5.46	0.03	3467.37	0.277378	5	-5.93	0.03	1174.9	0.301255	5	3	1	2.1	O[C@@H](CNCc1ccc(Oc2ccccc2)nc1)c1cc2ccccc2s1	27
1	10	A1B11	-6.06	0.05	870.964	0.277073	5	-5.83	0.06	1479.11	0.266557	5	1.7	4.2	1.7	O[C@@H](CNCc1cnc(-c2cccc3ccccc23)nc1)c1cc2ccccc2s1	30
1	12	A1B12	No binding (to 100mM)				5	No binding (to 100mM)				5		<-10	<-10	CC(C)(C)OC(=O)NCCNC[C@H](O)c1cc2ccccc2s1	23
1	13	A1B13	IC50>-4.5				5	-6.95	0.05	112.202	0.297905	5		<-3	21.9	O[C@@H](CNCc1cn(-c2ccccc2)nc1-c1cccc(Br)c1)c1cc2ccccc2s1	32
1	14	A1B14	-5.37	0.03	4265.8	0.32025	5	-6.33	0.03	467.735	0.377502	5	9.1	-1.2	5.2	O=C(O)Cn1cc(CNC[C@H](O)c2cc3ccccc3s2)nn1	23
1	15	A1B15	-6.87	0.12	134.896	0.409706	5	-7.45	0.14	35.4813	0.444295	5	3.8	26.9	69.2	O[C@@H](CNCCCc1ccc(Cl)cc1)c1cc2ccccc2s1	23
1	16	A1B16	No binding (to 100mM)				5	No binding (to 100mM)				5		<-10	<-10	O=C([O-])c1ccc(-c2ccc(CNC[C@H](O)c3cc4ccccc4s3)o2)cc1	28
1	17	A1B17	-4.69	0.03apparent	20417.4	0.292411	5	-5.33	0.03	4677.35	0.332313	5	4.4	-5.6	-1.9	O=C([O-])c1ccc(CNC[C@H](O)c2cc3ccccc3s2)s1	22
1	18	A1B18	-4.78	0.06apparent	16595.9	0.273187	5	-5.25	0.05apparent	5623.41	0.300048	5	3	-4.6	-2.3	O=C([O-])c1ccc(CNC[C@H](O)c2cc3ccccc3s2)c(O)c1	24
1	19	A1B19	-5.57	0.07	2691.53	0.318337	5	-6	0.04	1000	0.342912	5	2.7	1.3	2.5	O[C@@H](CNCc1ccc(-c2cc[nH]n2)s1)c1cc2ccccc2s1	24
1	20	A1B20	-4.84	0.10apparent	14454.4	0.276616	5	-5.67	0.05	2137.96	0.324052	5	6.8	-4	1.1	O=C([O-])c1ccc(CNC[C@H](O)c2cc3ccccc3s2)cc1F	24
1	21	A1B21	IC50>-4				5	-5.27	0.05apparent	5370.32	0.301191	5		<-10	-2.2	O=C([O-])Cc1ccc(CNC[C@H](O)c2cc3ccccc3s2)cc1	24
1	22	A1B22	-5.95	0.04	1122.02	0.326453	5	-6.13	0.07	741.31	0.336329	5	1.5	3.2	3.3	Cn1cc(-c2ccc(CNC[C@H](O)c3cc4ccccc4s3)s2)cn1	25
1	23	A1B23	-5.55	0.07	2818.38	0.317194	5	-5.76	0.05	1737.8	0.329196	5	1.6	1.3	1.4	O[C@@H](CNCc1cc2cc(Cl)ccc2[nH]1)c1cc2ccccc2s1	24
1	24	A1B24	IC50>-4				5	IC50>-4				5		<-10	<-10	O=C([O-])CCCOc1cccc(CNC[C@H](O)c2cc3ccccc3s2)c1	27
1	25	A1B25	No binding (to 100mM)				5	No binding (to 100mM)				5		<-10	<-10	COc1cc(CNC[C@H](O)c2cc3ccccc3s2)ccc1OCC(=O)[O-]	27
2	12	A2B12	-6.74	0.02	181.97	0.420224	5	-6.82	0.07	151.356	0.425211	5	1.2	2.2	-1.1	C(C)(C)(C)OC(=O)CNC[C@H](O)c2cc3ccccc3cc2	22
2	3	A2B3	IC50>-4				5	-5.9	0.02	1258.93	0.252898	5		<-10	2	O[C@H](CNCc1cn(-c2ccc(F)cc2)nc1-c1cccs1)c1ccc2ccccc2c1	32
2	4	A2B4	-5.55	0.04	2818.38	0.28195	4	-6.5	0.11	316.228	0.330212	4	8.9	1.1	8.1	Cc1ccc(CNC[C@@H](O)c2ccc3ccccc3c2)n1-c1ccncc1	27
2	5	A2B5	IC50>-4.5				5	-5.89	0.08	1288.25	0.252469	5		<-3	2	O[C@H](CNCc1cn(-c2ccccc2)nc1-c1ccccc1)c1ccc2ccccc2c1	32
2	7	A2B7	-5.29	0.05	5128.61	0.279078	5	-5.49	0.06	3235.94	0.289629	5	1.6	-1.6	-1.3	OCCOc1ccc(CNC[C@@H](O)c2ccc3ccccc3c2)cc1F	26
2	8	A2B8	-5.22	0.05	6025.6	0.298334	5	-5.59	0.09	2570.4	0.31948	5	2.3	-1.9	1	OCCc1ccc(CNC[C@@H](O)c2ccc3ccccc3c2)cc1	24
2	9	A2B9	-4.96	0.10apparent	10964.8	0.283474	5	-5.55	0.09	2818.38	0.317194	5	3.9	-3.4	-0.9	CC(NC[C@@H](O)c1ccc2ccccc2c1)c1ccc(CN)cc1	24
2	10	A2B10	IC50>-4.5				5	-5.17	0.05apparent	6760.83	0.253265	5		<-3	-2.6	O[C@H](CNCc1ccc(Oc2ccccc2)nc1)c1ccc2ccccc2c1	28
2	11	A2B11	-5.79	0.07	1621.81	0.256189	5	-5.51	0.07	3090.3	0.2438	5	1.9	2	-1.2	O[C@H](CNCc1cnc(-c2cccc3ccccc23)nc1)c1ccc2ccccc2c1	31
2	13	A2B13														O[C@H](CNCc1cn(-c2ccccc2)nc1-c1cccc(Br)c1)c1ccc2ccccc2c1	33
2	14	A2B14	-4.85	0.06apparent	14125.4	0.277188	4	-5.19	0.10apparent	6456.54	0.296619	5	2.2	-4.4	-2.5	O=C(O)Cn1cc(CNC[C@@H](O)c2ccc3ccccc3c2)nn1	24
2	15	A2B15	-5.15	0.02	7079.46	0.294333	5	-5.54	0.115	2884.03	0.316623	5	2.5	-2.2	-1.1	O[C@H](CNCCCc1ccc(Cl)cc1)c1ccc2ccccc2c1	24
2	16	A2B16	IC50>-4				5	-5.11	0.09apparent	7762.47	0.241694	5		<-10	-3	O=C([O-])c1ccc(-c2ccc(CNC[C@@H](O)c3ccc4ccccc4c3)o2)cc1	29
2	17	A2B17	-4.7	0.07apparent	19952.6	0.280294	5	-5.34	0.06apparent	4570.88	0.318461	5	4.4	-6.2	-1.8	O=C([O-])c1ccc(CNC[C@@H](O)c2ccc3ccccc3c2)s1	23
2	18	A2B18	No binding (to 100mM)				6	No binding (to 100mM)				6		<-10	<-10	O=C([O-])c1ccc(CNC[C@@H](O)c2ccc3ccccc3c2)c(O)c1	25
2	19	A2B19	No binding (to 100mM)				5	-5.09	0.05apparent	8128.31	0.279268	5		<-10	-3.2	O[C@H](CNCc1ccc(-c2cc[nH]n2)s1)c1ccc2ccccc2c1	25
2	20	A2B20	-4.99	0.06apparent	10232.9	0.273781	5	-5.59	0.04	2570.4	0.306701	5	4	-3.2	1	O=C([O-])c1ccc(CNC[C@@H](O)c2ccc3ccccc3c2)cc1F	25
2	21	A2B21	IC50>-4				5	IC50 about -4				5		<-10	<-10	O=C([O-])Cc1ccc(CNC[C@@H](O)c2ccc3ccccc3c2)cc1	25
2	22	A2B22	IC50>-4				5	IC50>-4				5		<-10	<-10	Cn1cc(-c2ccc(CNC[C@@H](O)c3ccc4ccccc4c3)s2)cn1	26
2	23	A2B23	IC50>-5				5	IC50>-5				5		<-10	<-10	O[C@H](CNCc1cc2cc(Cl)ccc2[nH]1)c1ccc2ccccc2c1	25
2	24	A2B24	No binding (to 100mM)				5	IC50>-4				5		<-10	<-10	O=C([O-])CCCOc1cccc(CNC[C@@H](O)c2ccc3ccccc3c2)c1	28
2	25	A2B25	-4.81	0.08	15488.2	0.23563	5	-5.13	0.04	7413.1	0.251306	5	2.1	-4.8	-2.9	COc1cc(CNC[C@@H](O)c2ccc3ccccc3c2)ccc1OCC(=O)[O-]	28
3	2	A3B2	IC50>-4.5				5	-5.49	0.05	3235.94	0.235324	5		<-3	-2.8	CCOC(=O)c1cc(-c2ccc(Cl)cc2)oc1CNC[C@H](O)c1ccc2c(c1)OCCO2	32
3	3	A3B3	IC50>-5				5	-6.79	0.08	162.181	0.291047	5		<-3	7.2	O[C@@H](CNCc1cn(-c2ccc(F)cc2)nc1-c1cccs1)c1ccc2c(c1)OCCO2	32
3	4	A3B4	-5.05	0.04	8912.51	0.256549	5	-5.57	0.07	2691.53	0.282966	5	3.1	-3.7	-2.3	Cc1ccc(CNC[C@H](O)c2ccc3c(c2)OCCO3)n1-c1ccncc1	27
3	5	A3B5	-5.66	0.05	2187.76	0.242611	5	-6.73	0.06	186.209	0.288475	5	11.7	1.1	6.3	O[C@@H](CNCc1cn(-c2ccccc2)nc1-c1ccccc1)c1ccc2c(c1)OCCO2	32
3	7	A3B7	-5.7	0.06	1995.26	0.300708	5	-6.09	0.05	812.831	0.321283	5	2.5	1.2	1.4	OCCOc1ccc(CNC[C@H](O)c2ccc3c(c2)OCCO3)cc1F	26
3	8	A3B8	-5.28	0.06	5248.07	0.301763	5	-5.52	0.05	3019.95	0.315479	5	1.7	-2.2	-2.6	OCCc1ccc(CNC[C@H](O)c2ccc3c(c2)OCCO3)cc1	24
3	10	A3B10	-5.31	0.03	4897.79	0.260124	5	-5.71	0.04	1949.84	0.279719	5	2.5	-2	-1.7	O[C@@H](CNCc1ccc(Oc2ccccc2)nc1)c1ccc2c(c1)OCCO2	28
3	11	A3B11	-5.89	0.08	1288.25	0.260613	5	-5.79	0.06	1621.81	0.256189	5	1.3	-1.9	-1.4	O[C@@H](CNCc1cnc(-c2cccc3ccccc23)nc1)c1ccc2c(c1)OCCO2	31
3	14	A3B14	-5.23	0.03	5888.44	0.298905	5	-5.39	0.07	4073.8	0.30805	5	1.4	-2.5	-3.5	O=C(O)Cn1cc(CNC[C@H](O)c2ccc3c(c2)OCCO3)nn1	24
3	15	A3B15	-6.93	0.07	117.49	0.396064	5	-7.26	0.1	54.9541	0.414924	5	2.1	20.4	21.4	O[C@@H](CNCCCc1ccc(Cl)cc1)c1ccc2c(c1)OCCO2	24
3	16	A3B16	IC50>-4				5	-5.05	0.04apparent	8912.51	0.238856	5		<-10	-7.6	O=C([O-])c1ccc(-c2ccc(CNC[C@H](O)c3ccc4c(c3)OCCO4)o2)cc1	29
3	17	A3B17	No binding (to 100mM)				6	IC50>-4				6		<-10	<-10	O=C([O-])c1ccc(CNC[C@H](O)c2ccc3c(c2)OCCO3)s1	23
3	18	A3B18	No binding (to 100mM)				5	IC50>-4				5		<-10	<-10	O=C([O-])c1ccc(CNC[C@H](O)c2ccc3c(c2)OCCO3)c(O)c1	25
3	19	A3B19	-5.33	0.08	4677.35	0.292436	5	-5.39	0.03	4073.8	0.295728	5	1.2	-1.9	-3.5	O[C@@H](CNCc1ccc(-c2cc[nH]n2)s1)c1ccc2c(c1)OCCO2	25
3	20	A3B20	IC50>-4				6	IC50>-4				6		<-10	<-10	O=C([O-])c1ccc(CNC[C@H](O)c2ccc3c(c2)OCCO3)cc1F	25
3	21	A3B21	IC50>-4				5	IC50>-4				5		<-10	<-10	O=C([O-])Cc1ccc(CNC[C@H](O)c2ccc3c(c2)OCCO3)cc1	25
3	22	A3B22	-5.9	0.14	1258.93	0.311259	4	-5.84	0.08	1445.44	0.308094	3	1.1	1.9	-1.2	Cn1cc(-c2ccc(CNC[C@H](O)c3ccc4c(c3)OCCO4)s2)cn1	26
3	23	A3B23	-6.09	0.03	812.831	0.334134	6	-6.21	0.03	616.595	0.340718	6	1.3	3	1.9	O[C@@H](CNCc1cc2cc(Cl)ccc2[nH]1)c1ccc2c(c1)OCCO2	25
3	24	A3B24	IC50>-5				5	IC50>-5				5		<-3	<-3	O=C([O-])CCCOc1cccc(CNC[C@H](O)c2ccc3c(c2)OCCO3)c1	28
3	25	A3B25	IC50>-4				5	IC50>-4				5		<-10	<-10	COc1cc(CNC[C@H](O)c2ccc3c(c2)OCCO3)ccc1OCC(=O)[O-]	28
4	1	A4B1	No binding (to 100mM)				5	IC50>-4				5		<-100	<-300	O=C(NCCNC[C@H](O)COc1cccc2ccccc12)OCc1ccccc1	29
4	2	A4B2	No binding (to 100mM)				5	No binding (to 100mM)				5		<-100	<-300	CCOC(=O)c1cc(-c2ccc(Cl)cc2)oc1CNC[C@H](O)COc1cccc2ccccc12	34
4	3	A4B3	IC50>-4				5	-5.48	0.06apparent	3311.31	0.221078	4		<-100	-93.3	O[C@@H](CNCc1cn(-c2ccc(F)cc2)nc1-c1cccs1)COc1cccc2ccccc12	34
4	4	A4B4	IC50>-4				5	IC50>-4				5		<-100	<-300	Cc1ccc(CNC[C@H](O)COc2cccc3ccccc23)n1-c1ccncc1	29
4	5	A4B5	IC50>-5.5				6	-7.26	0.07	54.9541	0.292888	6		<-10	-1.5	O[C@@H](CNCc1cn(-c2ccccc2)nc1-c1ccccc1)COc1cccc2ccccc12	34
4	6	A4B6	IC50>-4				5	-5.46	0.02	3467.37	0.24964	5		<-100	-97.7	OC1CCN(c2nc(Cl)c(CNC[C@H](O)COc3cccc4ccccc34)s2)CC1	30
4	7	A4B7	IC50>-4				5	IC50>-4				5		<-100	<-300	OCCOc1ccc(CNC[C@H](O)COc2cccc3ccccc23)cc1F	28
4	8	A4B8	IC50>-4				5	-5.63	0.07	2344.23	0.297015	5		<-100	-66.1	OCCc1ccc(CNC[C@H](O)COc2cccc3ccccc23)cc1	26
4	9	A4B9	No binding (to 100mM)				5	No binding (to 100mM)				5		<-100	<-300	CC(NC[C@H](O)COc1cccc2ccccc12)c1ccc(CN)cc1	26
4	10	A4B10	-6.6	0.1	251.189	0.301763	5	-7.51	0.07	30.903	0.34337	5	8.1	-1.5	1.1	O[C@@H](CNCc1ccc(Oc2ccccc2)nc1)COc1cccc2ccccc12	30
4	11	A4B11	-6.98	0.04	104.713	0.290125	5	-7.41	0.07	38.9045	0.307998	5	2.7	1.6	-1.1	O[C@@H](CNCc1cnc(-c2cccc3ccccc23)nc1)COc1cccc2ccccc12	33
4	13	A4B13	-6.3	0.02	501.187	0.246897	5	-7.3	0.03	50.1187	0.286087	5	10	-3	-1.4	O[C@@H](CNCc1cn(-c2ccccc2)nc1-c1cccc(Br)c1)COc1cccc2ccccc12	35
4	14	A4B14	-6.25	0.03	562.341	0.329724	7	-7.4	0.04	39.8107	0.390393	7	14.1	-3.3	-1.1	O=C(O)Cn1cc(CNC[C@H](O)COc2cccc3ccccc23)nn1	26
4	15	A4B15	-6.7	0.08	199.526	0.353464	6	-7.66	0.1	21.8776	0.404109	6	9.1	-1.2	1.6	O[C@@H](CNCCCc1ccc(Cl)cc1)COc1cccc2ccccc12	26
4	16	A4B16	-6.21	0.06	616.595	0.274772	5	-7	0.04	100	0.309727	5	6.2	-3.6	-2.8	O=C([O-])c1ccc(-c2ccc(CNC[C@H](O)COc3cccc4ccccc34)o2)cc1	31
4	17	A4B17	-5.04	0.11	9120.11	0.276525	5	-5.91	0.06	1230.27	0.324258	5	7.4	-53.7	-34.7	O=C([O-])c1ccc(CNC[C@H](O)COc2cccc3ccccc23)s1	25
4	18	A4B18	-6.22	0.08	602.56	0.315988	5	-7.29	0.06	51.2861	0.370345	5	11.7	-3.5	-1.4	O=C([O-])c1ccc(CNC[C@H](O)COc2cccc3ccccc23)c(O)c1	27
4	19	A4B19	-6.22	0.05	602.56	0.315988	6	-7.25	0.05	56.2341	0.368313	6	10.7	-3.5	-1.6	O[C@@H](CNCc1ccc(-c2cc[nH]n2)s1)COc1cccc2ccccc12	27
4	20	A4B20	-6.38	0.03	416.869	0.324116	6	-7.33	0.05	46.7735	0.372378	6	8.9	-2.5	-1.3	O=C([O-])c1ccc(CNC[C@H](O)COc2cccc3ccccc23)cc1F	27
4	21	A4B21	-6.58	0.03	263.027	0.334276	6	-7.72	0.06	19.0546	0.39219	6	13.8	-1.5	1.9	O=C([O-])Cc1ccc(CNC[C@H](O)COc2cccc3ccccc23)cc1	27
4	26	A4B26	-6.16	0.04	691.831	0.291357	6	-6.94	0.05	114.815	0.32825	6	6	-4.1	-3.3	O=C([O-])COc1ccc(CNC[C@H](O)COc2cccc3ccccc23)cc1Br	29
4	27	A4B27	-7.16	0.02	69.1831	0.35075	6	-8.15	0.06	7.07946	0.399248	6	9.8	2.5	5	O=C([O-])/C=C/c1ccc(CNC[C@H](O)COc2cccc3ccccc23)cc1	28
4	28	A4B28	-6.29	0.05	512.861	0.319544	6	-7.06	0.05	87.0964	0.358661	6	5.9	-3	-2.5	O[C@@H](CNCc1cc2cc(Br)ccc2[nH]1)COc1cccc2ccccc12	27
4	29	A4B29	-6.04	0.05	912.011	0.306843	6	-7.11	0.05	77.6247	0.361201	6	11.7	-5.4	-2.2	O[C@@H](CNCc1csc(-c2ccco2)n1)COc1cccc2ccccc12	27
5	1	A5B1	-6.12	0.04	758.578	0.322865	5	-6.5	0.03	316.228	0.342912	5	2.4	-1.9	-2.3	Cc1ccccc1OC[C@@H](O)CNCCNC(=O)OCc1ccccc1	26
5	2	A5B2	-5.79	0.03	1621.81	0.256189	5	-6.51	0.06	309.03	0.288046	5	5.2	-4	-2.3	CCOC(=O)c1cc(-c2ccc(Cl)cc2)oc1CNC[C@H](O)COc1ccccc1C	31
5	3	A5B3	-6.13	0.06	741.31	0.271233	6	-7.11	0.05	77.6247	0.314595	6	9.5	-1.8	1.7	Cc1ccccc1OC[C@@H](O)CNCc1cn(-c2ccc(F)cc2)nc1-c1cccs1	31
5	4	A5B4	-6.96	0.06	109.648	0.36718	5	-7.47	0.05	33.8844	0.394086	5	3.2	3.7	4	Cc1ccccc1OC[C@@H](O)CNCc1ccc(C)n1-c1ccncc1	26
5	5	A5B5	-6.4	0.05	398.107	0.283179	6	-7.14	0.04	72.4436	0.315922	6	5.5	1	1.9	Cc1ccccc1OC[C@@H](O)CNCc1cn(-c2ccccc2)nc1-c1ccccc1	31
5	6	A5B6	IC50>-4				5	-5.31	0.13 apparent	4897.79	0.269758	5		<-100	-36.3	OC1CCN(c2nc(Cl)c(CNC[C@H](O)COc3c(C)cccc3)s2)CC1	27
5	7	A5B7	-6.35	0.04	446.684	0.348399	6	-7.13	0.04	74.131	0.391195	6	6	-1.1	1.8	Cc1ccccc1OC[C@@H](O)CNCc1ccc(OCCO)c(F)c1	25
5	8	A5B8	-6.01	0.04	977.237	0.358418	5	-6.86	0.12	138.038	0.40911	5	7.1	-2.4	1	Cc1ccccc1OC[C@@H](O)CNCc1ccc(CCO)cc1	23
5	11	A5B11	-6.72	0.04	190.546	0.30725	6	-6.98	0.06	104.713	0.319137	6	1.8	2.1	1.3	Cc1ccccc1OC[C@@H](O)CNCc1cnc(-c2cccc3ccccc23)nc1	30
5	12	A5B12	-6.37	0.06	426.58	0.379887	5	-6.86	0.04	138.038	0.40911	5	3.1	1	1	Cc1ccccc1OC[C@@H](O)CNCCNC(=O)OC(C)(C)C	23
5	13	A5B13	-6.51	0.03	309.03	0.279045	6	-7.38	0.08	41.6869	0.316337	6	7.4	1.3	3.2	Cc1ccccc1OC[C@@H](O)CNCc1cn(-c2ccccc2)nc1-c1cccc(Br)c1	32
5	14	A5B14	-6.46	0.04	346.737	0.385255	5	-7.03	0.07	93.3254	0.419248	5	3.7	1.2	1.4	Cc1ccccc1OC[C@@H](O)CNCc1cn(CC(=O)O)nn1	23
5	15	A5B15	-7.52	0.05	30.1995	0.44847	7	-7.92	0.04	12.0226	0.472325	7	2.5	13.5	11.2	Cc1ccccc1OC[C@@H](O)CNCCCc1ccc(Cl)cc1	23
5	16	A5B16	-5	0.08	10000	0.244937	5	-5.27	0.07	5370.32	0.258164	5	1.9	-24.5	-39.8	Cc1ccccc1OC[C@@H](O)CNCc1ccc(-c2ccc(C(=O)[O-])cc2)o1	28
5	17	A5B17	No binding (to 100mM)				5	IC50>-4				5		<-100	<-100	Cc1ccccc1OC[C@@H](O)CNCc1ccc(C(=O)[O-])s1	22
5	18	A5B18	-5.14	0.02	7244.36	0.293762	5	-5.67	0.04	2137.96	0.324052	5	3.4	-17.8	-15.8	Cc1ccccc1OC[C@@H](O)CNCc1ccc(C(=O)[O-])cc1O	24
5	19	A5B19	-6.29	0.05	512.861	0.359487	5	-6.92	0.06	120.226	0.395492	5	4.3	-1.3	1.1	Cc1ccccc1OC[C@@H](O)CNCc1ccc(-c2cc[nH]n2)s1	24
5	20	A5B20	No binding (to 100mM)				5	IC50>-4				5		<-100	<-100	Cc1ccccc1OC[C@@H](O)CNCc1ccc(C(=O)[O-])c(F)c1	24
5	21	A5B21	IC50>-4				5	-5.11	0.06	7762.47	0.292047	5		<-100	<-100	Cc1ccccc1OC[C@@H](O)CNCc1ccc(CC(=O)[O-])cc1	24
5	26	A5B26	-5.35	0.08	4466.84	0.282243	5	-6.01	0.06	977.237	0.317062	6	4.6	-11	-7.2	Cc1ccccc1OC[C@@H](O)CNCc1ccc(OCC(=O)[O-])c(Br)c1	26
5	27	A5B27	-5.35	0.06	4466.84	0.293533	5	-5.18	0.07	6606.93	0.284206	5	1.5	-11	-49	Cc1ccccc1OC[C@@H](O)CNCc1ccc(/C=C/C(=O)[O-])cc1	25
5	28	A5B28	-6.17	0.05	676.083	0.352628	5	-6.42	0.04	380.189	0.366916	5	1.8	-1.7	-2.8	Cc1ccccc1OC[C@@H](O)CNCc1cc2cc(Br)ccc2[nH]1	24
5	29	A5B29	-5.95	0.06	1122.02	0.340055	5	-6.84	0.04	144.544	0.39092	5	7.8	-2.8	-1.1	Cc1ccccc1OC[C@@H](O)CNCc1csc(-c2ccco2)n1	24
		A21	IC50>-3				6	IC50>-3				6				c1ccnc(c1)c2cccc3c2O[C@@H](C3)C[NH3+]	17
		A04	-6.83	0.04	147.911	0.585523	6	-7.49	0.04	32.3594	0.642104	6	4.6			c1ccc2c(c1)cccc2OC[C@H](C[NH3+])O	16
		A07	No binding (up to 1mM)				6	No binding				6				c1cc(ccc1C[C@H](CC(=O)[O-])[NH3+])C(F)(F)F	17
		A08	-4.01	0.03apparent	97723.7	0.39288	6	-4.78	0.04	16595.9	0.46832	6	5.9			Cc1c(c2ccccc2[nH]1)SCC[NH3+]	14
		A20	-3.73	0.04apparent	186209	0.341084	6	-4.38	0.05apparent	41686.9	0.400522	6	4.5			COc1cccc(c1)c2cc(no2)C[NH3+]	15
		A06	No binding (up to 1mM)				6	No binding				6				c1cc(cc(c1)C(=O)[O-])CNC(=O)NCC[NH3+]	17
		A01	-5.43	0.03	3715.35	0.572928	6	-5.6	0.04	2511.89	0.590865	6	1.5			c1ccc2c(c1)cc(s2)[C@H](C[NH3+])O	13
		A02	-5.52	0.02	3019.95	0.540822	6	-5.63	0.05	2344.23	0.551599	6	1.3			c1ccc2cc(ccc2c1)[C@@H](C[NH3+])O	14
		A09	-3.71	0.05apparent	194984	0.339255	6	-4.34	0.05apparent	45708.8	0.396864	6	4.3			Cc1ccc(F)c(CN2CC[C@H](N)C2)c1	15
		A10	-3.98	0.03apparent	104713	0.38994	6	-4.48	0.03apparent	33113.1	0.438928	6	3.2			c1cc(cc(c1)C(F)(F)F)CCC[NH3+]	14
		A11	-4.7	0.03	19952.6	0.429784	6	-5.69	0.03	2041.74	0.520313	6	9.8			Cc1cccc2c1n(cc2C[C@H](C)[NH3+])C	15
		A12	-5.7	0.03	1995.26	0.459906	6	-6.67	0.05	213.796	0.538171	6	9.3			Cc1cc2c(c(c1)c3cccs3)O[C@@H](C2)C[NH3+]	17
		A13	-4.26	0.04apparent	54954.1	0.449479	6	-4.64	0.05apparent	22908.7	0.489574	6	2.4			C[C@@H](Cc1ccc2c(c1)cco2)[NH3+]	13
		A14	-4.15	0.03apparent	70794.6	0.406596	6	-4.84	0.04	14454.4	0.474199	6	4.9			COc1ccc2[nH]cc(CCN)c2c1	14
		A15	No binding (up to 1mM)				6	No binding				6				c1cc(ccc1C[C@H](CC(=O)[O-])[NH3+])C#N	15
		A16	-3.71	0.02apparent	194984	0.339255	6	-4.23	0.05apparent	58884.4	0.386805	6	3.3			C[C@@H](c1ncc(o1)c2ccc(cc2)F)[NH3+]	15
		A17	-4.24	0.04apparent	57544	0.415414	6	-4.73	0.03apparent	18620.9	0.463422	6	3.1			c1cc(c(cc1CC[NH3+])C(F)(F)F)Cl	14
		A18	No binding (up to 1mM)				6	No binding				6				C[C@@H](C(=O)N1CCc2ccccc2C1)[NH3+]	15
		A19	-4.22	0.02apparent	60256	0.413454	6	-4.63	0.03 apparent	23442.3	0.453624	6	2.6			Cn1cc(c2c1ccc(c2)O)CC[NH3+]	14
		A05	-6.42	0.04	380.189	0.677384	6	-6.89	0.04	128.825	0.726974	6	3			Cc1ccccc1OC[C@H](C[NH3+])O	13
		A03	-5.61	0.02	2454.71	0.54964	6	-5.91	0.03	1230.27	0.579032	6	2			c1cc2c(cc1[C@H](C[NH3+])O)OCCO2	14
